# Supplementary material for: Non-redundant roles of the CCR1 and CCR2 chemokine axes in monocyte recruitment during lung metastasis
Source: PubMed Central journal article supplement (PMC11617888; doi:10.1016/j.neo.2024.101089), 2024-11-19
Supplement: mmc1.pdf [file mmc1.pdf]

**Supplementary Data**

***Liner et al.***

**Non-redundant roles of the CCR1 and CCR2 chemokine axes in monocyte recruitment during lung metastasis**

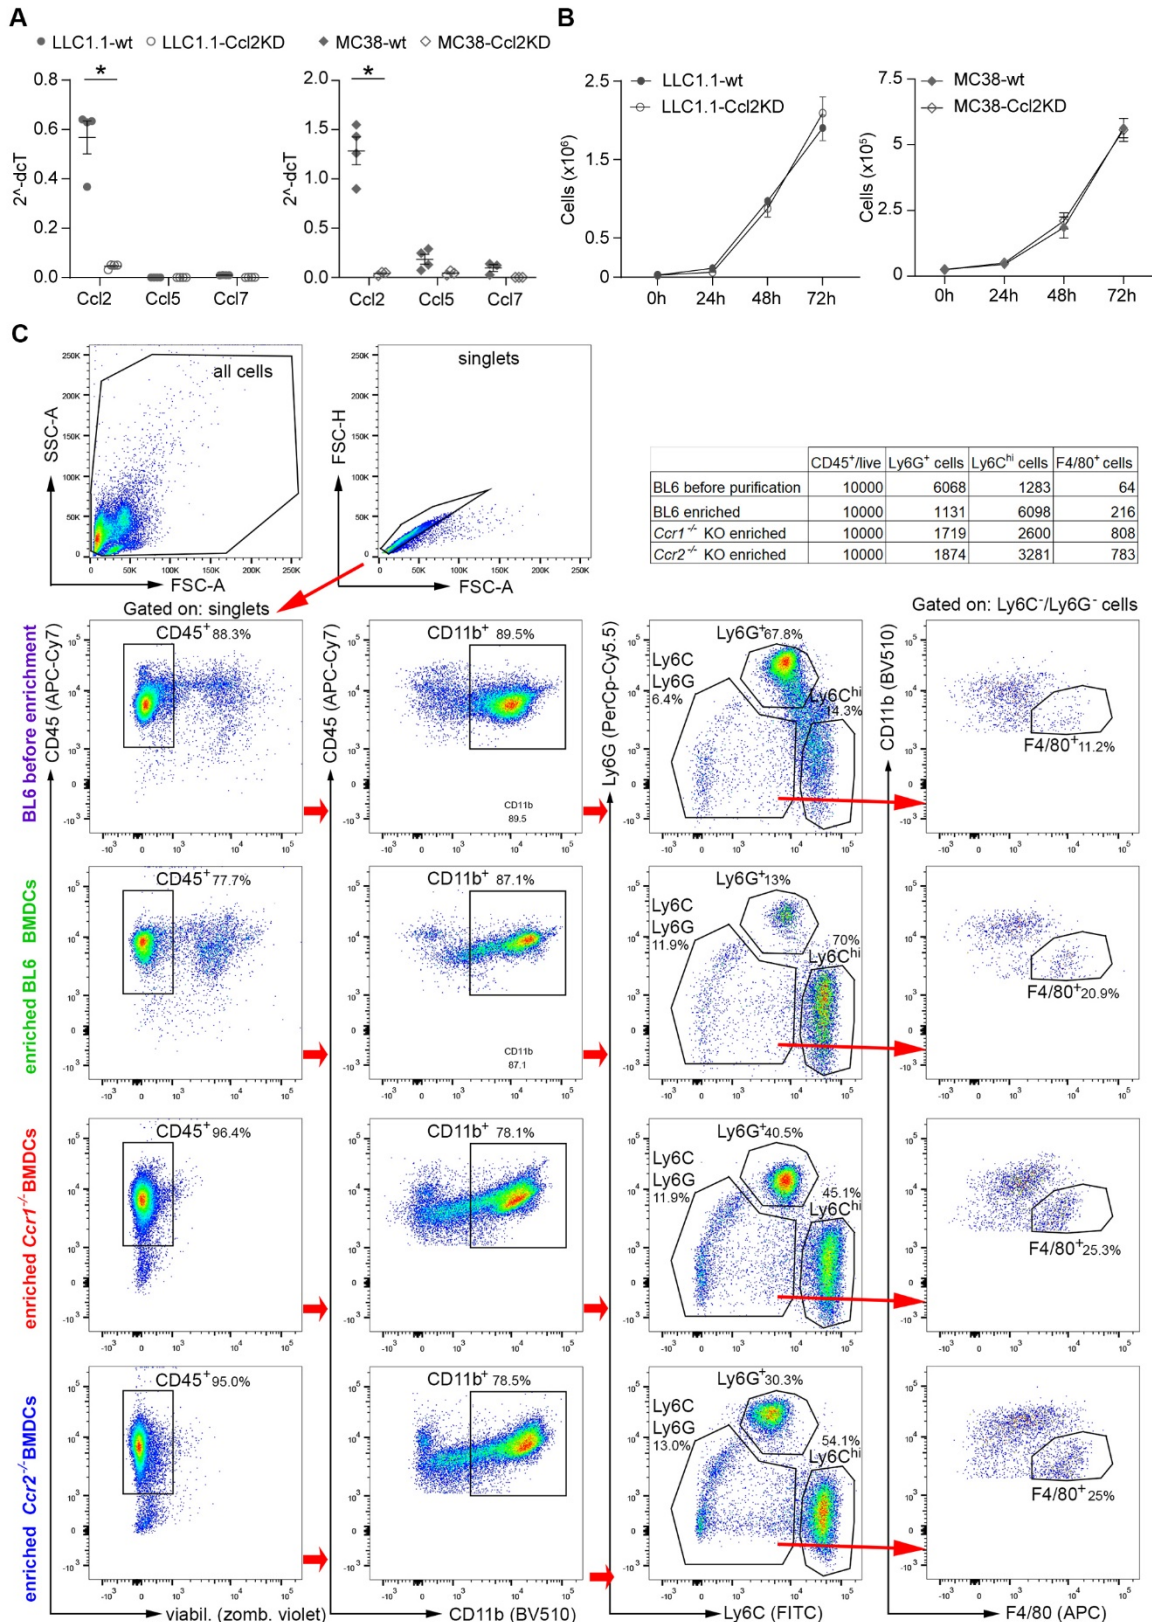

**Supplementary Figure 1. Ccl2-knock down tumor cells inhibits recruitment of monocytes in Ccr1- and Ccr2-dependent manner. A**, qPCR analysis of chemokines from LLC1.1 (left) and from MC38GFP (right) wt and Ccl2KD tumor cells. Three independent experiments, n=3-4. **B**, Cell proliferation assay of LLC1.1 (upper) and MC38GFP (lower) -wt and -Ccl2KD cells *in vitro*. **C**,

Enrichment of CD115<sup>+</sup> monocytes from the bone marrow using anti-CD115<sup>+</sup>-antibody based magnetic cell sorting. WT samples before and after enrichment are presented and enriched samples of *Ccr1*<sup>-/-</sup> and *Ccr2*<sup>-/-</sup> are shown with percentual populations and absolute number of cells (upper right). The Mann-Whitney test was used for statistical analysis. ns, not significant; \*, P < 0.05; \*\*, P < 0.01; \*\*\*, P < 0.001.

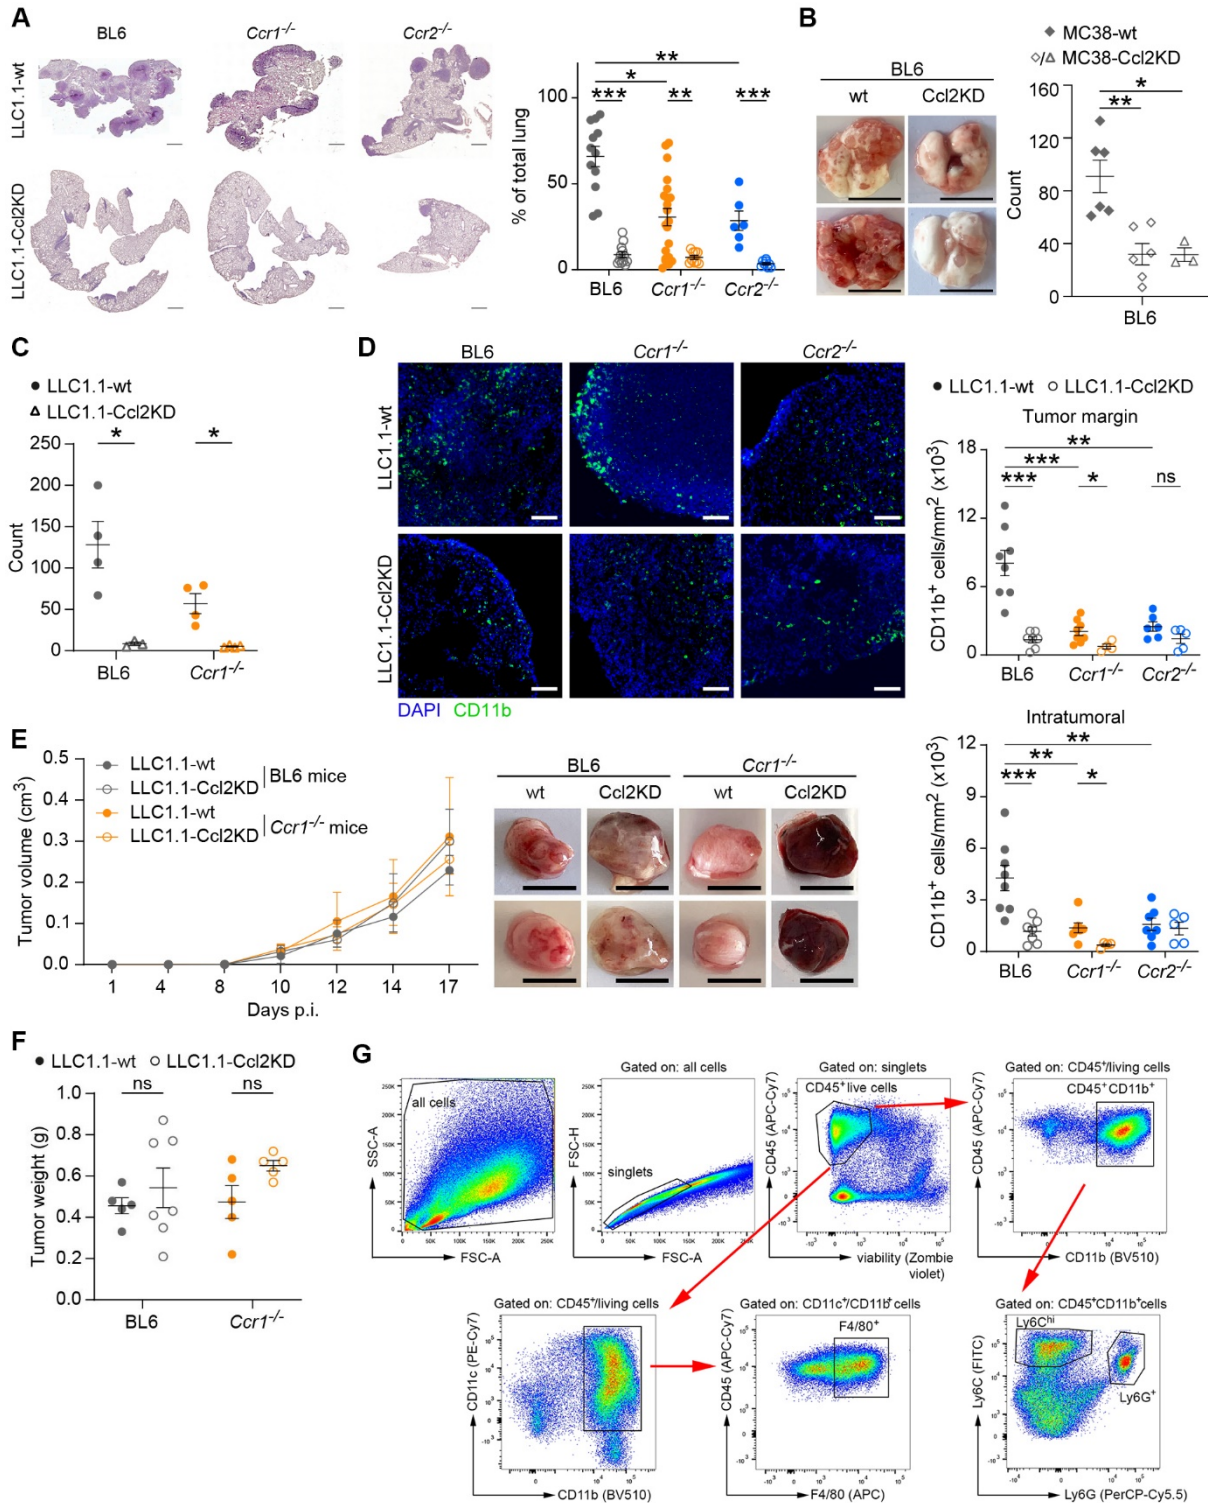

**Supplementary Figure 2. Tumor cell derived Ccl2 facilitates growth of experimental lung metastases with both MC38GFP and LLC1.1 tumor cells, while *Ccr1* deficiency does not affect subcutaneous LLC1.1 wt tumor growth.** **A-D**, LLC1.1 cells (wt or Ccl2KD) were intravenously injected in BL6 (grey), *Ccr1*<sup>-/-</sup> (orange) or *Ccr2*<sup>-/-</sup> (blue) mice and metastasis were assessed on day 15. **A**, Representative images (left panel) of lung sections stained with H&E and metastatic area quantification in the lungs (right panel). Scale bar, 1 mm; n=4-7; each tissue was analyzed at 2-4 different tissue depths (dot = tissue section). **B**, Experimental lung metastasis of MC38GFP-wt and -Ccl2KD tumor

cells in BL6 wt mice on day 21. Representative images of lungs (left panel), and quantification of metastatic foci (right panel) where two different *Ccl2*KD clones were analyzed (empty circles and triangles). Scale bar, 1 cm. **C**, Quantification of lung metastatic foci of LLC1.1-wt and the second *Ccl2*KD clone of LLC1.1 (open symbols) in BL6 and *Ccr1*<sup>-/-</sup> mice on day 15. **D**, Representative pictures of lung metastatic foci (left panel) of CD11b<sup>+</sup> cells (green) counterstained with DAPI (blue) from BL6, *Ccr1*<sup>-/-</sup> and *Ccr2*<sup>-/-</sup> mice i.v. injected with LLC1.1-wt or -*Ccl2*KD cells. The quantification of CD11b<sup>+</sup> cells per mm<sup>2</sup> in both the tumor margin (upper panel) and inside the metastatic foci (lower panel). Scale bar, 100 μm; n=4-7; each tissue was analyzed at 2-3 different tissue depths (dot = tissue section). **E-F**, LLC1.1 cells (wt or *Ccl2*KD) were subcutaneously injected in BL6 and *Ccr1*<sup>-/-</sup> mice, the primary tumor was removed on day 15 and lung metastases were analyzed after an additional 21 days. **E**, Primary tumor growth in BL6 and *Ccr1*<sup>-/-</sup> mice (LLC1.1wt and *Ccl2*KD cells). n=5-7. Representative pictures of primary tumors (right panel); scale bar, 1 cm. **F**, final tumor weight n=5-7. **G**, Flow cytometry gating strategy for the analysis of immune cells from lung metastatic foci. The Mann-Whitney test was used for statistical analysis. ns, not significant; \* P < 0.05.

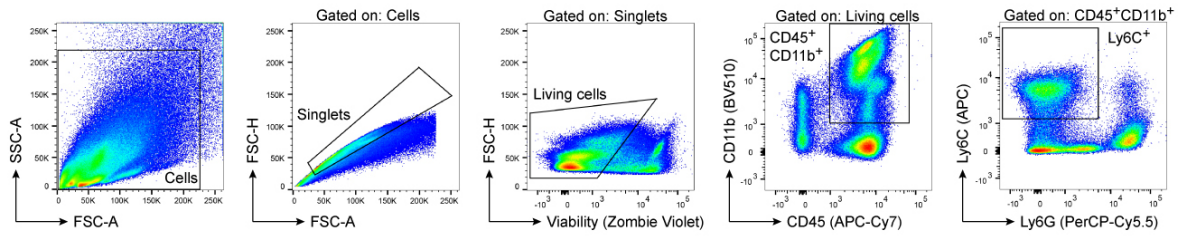

**Supplementary Figure 3. Quantification of Ly6C<sup>hi</sup> monocyte recruitment to the lungs.** Gating strategy to analyze Ly6C<sup>hi</sup> cells recruited to naïve and metastatic lungs using flow cytometry.

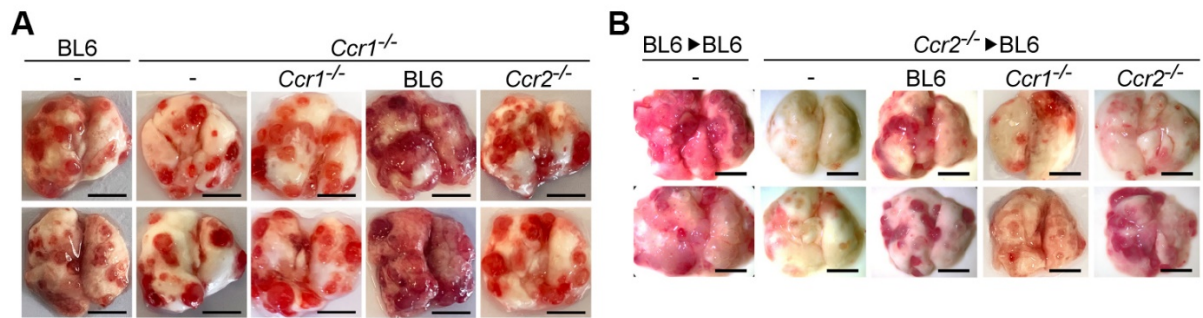

**Supplementary Figure 4. Circulating monocytes promote experimental lung metastasis in a *Ccr2*-independent manner.** **A**, Representative pictures of metastatic lungs from BL6 and *Ccr1*<sup>-/-</sup> mice i.v. injected with LLC1.1-wt cells followed by AT of CD115<sup>+</sup> cells isolated from BL6, *Ccr1*<sup>-/-</sup> or *Ccr2*<sup>-/-</sup>. Scale bar, 1 cm. **B**, Representative pictures of lungs from chimeric mice (BL6→BL6 and *Ccr2*<sup>-/-</sup>→BL6) injected with LLC1.1-wt tumor cells. Scale bar, 1 cm.

## Supplementary Table 1

### qRT-PCR primer sequences

| Gene         | Forward                        | Reverse                       |
|--------------|--------------------------------|-------------------------------|
| <i>Ccl2</i>  | 5'-TTAAGCCCCACTCACCTGC-3'      | 5'-TGGGGTCAGCACAGACCTCTC-3'   |
| <i>Ccl5</i>  | 5`-GCTGCTTTGCCTACCTCTCC-3`     | 5`-TCGAGTGACAAACACGACTGC-3`   |
| <i>Ccl7</i>  | 5'-TGGGAAGCTGTTATCTTCAAGACA-3' | 5'-CTCGACCCACTTCTGATGGG -3'   |
| <i>Ccr1</i>  | 5'-AAGATCCTCAAAGGCCAGAAACA-3'  | 5'-AGTTGTGGGGTAGGCTTCTGTGA-3' |
| <i>Ccr2</i>  | 5'-GCAAGTTCAGCTGCCTGCAAA-3'    | 5'-GTATGCCGTGGATGAACTGAGGT-3' |
| <i>Ccr3</i>  | 5'-TCACCAGAGACAAGTAGAATGGCA-3' | 5'-AGTGGAGGCAGGAGCCATGA-3'    |
| <i>Gapdh</i> | 5'-CATGTTCCAGTATGACTCCAC-3'    | 5'-GGCCTCACCCATTGATGT-3'      |

## Supplementary Table 2

### Flow cytometry antibodies

| Antigen | Fluorophore  | Clone  | Company   |
|---------|--------------|--------|-----------|
| CD45    | APC-Cy7      | 30-F11 | Biolegend |
| CD11b   | BV510/Amcyan | M1/70  | Biolegend |
| CD11c   | PE-cy7       | N418   | Biolegend |
| F480    | APC          | A3-1   | Bio-Rad   |
| Ly6C    | FITC / APC*  | HK1.4  | Biolegend |
| Ly6G    | PerCP-cy5.5  | 1A8    | Biolegend |

\*Used for Ly6C<sup>hi</sup> cell recruitment
